# Supplementary material
Source: Research Square preprint supplement (doi:10.21203/rs.3.rs-9453354/v1)
Supplement: Supplementary file 1 [file 1924261f889d880e1760fe56.docx]

**Table S1.** Distribution of genes across RAST subsystem categories in the *L. plantarum* M2 genome.

| **Functional category** | **Gene Count** |
| --- | --- |
| Miscellaneous | 13 |
| Amino Acids and Derivatives | 157 |
| Sulfur Metabolism | 3 |
| Cell Division and Cell Cycle | 4 |
| Potassium Metabolism | 7 |
| Stress Response | 20 |
| Dormancy and Sporulation | 1 |
| Prophages and Transposons | 6 |
| Cell Wall and Capsule | 18 |
| Nucleotides and Nucleosides | 84 |
| Fatty Acids and Lipids | 16 |
| Metabolism of Aromatic Compounds | 4 |
| Carbohydrates | 186 |
| Protein Metabolism | 123 |
| Respiration | 14 |
| Defense and Virulence | 35 |
| Nitrogen Metabolism | 0 |
| Cofactors and Vitamins | 86 |
| DNA Metabolism | 60 |
| Photosynthesis | 0 |
| Secondary Metabolism | 4 |
| Cell Signaling and Regulation | 15 |
| Motility and Chemotaxis | 0 |
| Membrane Transport | 26 |
| Phosphorus Metabolism | 6 |
| Iron Acquisition and Metabolism | 5 |

**Table S2.** Distribution of genes associated with defense and virulence

| **Category** | **Gene Count** |
| --- | --- |
| SSU ribosomal proteins* | 4 |
| LSU ribosomal proteins* | 2 |
| DNA transcription* | 3 |
| Tetracycline resistance | 4 |
| Copper resistance | 7 |
| Efflux pumps | 3 |
| Fluoroquinolone resistance | 2 |
| Bile hydrolysis | 4 |
| Cobalt, zinc, and cadmium resistance | 6 |

*Included in the table because they were classified as such by the software due to similarity to mycobacterial proteins.

**Table S3. OrthoVenn3 summary statistics and strain metadata for the 10 *Lactiplantibacillus plantarum* proteomes included in the comparative analysis.**

| **Strain** | **Proteins** | **Clusters** | **Singletons** |
| --- | --- | --- | --- |
| *L. plantarum* Z45 | 3344 | 2908 | 256 |
| *L. plantarum* M2 | 3230 | 2975 | 203 |
| *L. plantarum* NCU116 | 3154 | 2984 | 132 |
| *L. plantarum* WCFS1 | 3122 | 2965 | 111 |
| *L. plantarum* 299v | 3105 | 3034 | 57 |
| *L. plantarum* 6Y15 | 3091 | 2894 | 125 |
| *L. plantarum* ST-III | 3084 | 3011 | 41 |
| *L. plantarum* DSMZ 20174 | 3026 | 3003 | 3 |
| *L. plantarum* ATCC 14917 | 2993 | 2981 | 0 |
| *L. plantarum* JDM1 | 2978 | 2882 | 73 |

**Table S4.** PathogenFinder Gene Similarity Analysis

| **Project ID** | **Organism** | **Gene location** | **Classification** | **Protein function** | **Protein ID** | **Similarity (%)** |
| --- | --- | --- | --- | --- | --- | --- |
| 317 | Oenococcus oeni PSU-1 | Chromosome | Lactobacilli | Cation-transporting ATPase | ABJ56320 | 98.26 |
| 317 | Oenococcus oeni PSU-1 | Chromosome | Lactobacilli | Crp-like transcriptional regulator | ABJ56327 | 97.29 |
| 317 | Oenococcus oeni PSU-1 | Chromosome | Lactobacilli | Ferritin-like DNA-binding protein | ABJ56325 | 97.28 |
| 317 | Oenococcus oeni PSU-1 | Chromosome | Lactobacilli | Thiol–disulfide isomerase / thioredoxin | ABJ56322 | 99.06 |
| 317 | Oenococcus oeni PSU-1 | Chromosome | Lactobacilli | Hypothetical protein (nickel resistance determinant) | ABJ56323 | 96.63 |
| 398 | Pediococcus pentosaceus ATCC 25745 | Chromosome | Lactobacilli | α-Galactosidase | ABJ67608 | 98.19 |
| 398 | Pediococcus pentosaceus ATCC 25745 | Chromosome | Lactobacilli | Phage-like protein, terminasse | ABJ68061 | 91.93 |
| 398 | Pediococcus pentosaceus ATCC 25745 | Chromosome | Lactobacilli | IS30 family transposase | ABJ67591 | 94.62 |
| 398 | Pediococcus pentosaceus ATCC 25725 | Chromosome | Lactobacilli | Phage terminase, small subunit | ABJ68062 | 94.04 |
| 32197 | Lactobacillus rhamnosus Lc 705 | Plasmid | Lactobacilli | β-Galactosidase (GH42) | CAR91801 | 99.52 |
| 32197 | Lactobacillus rhamnosus Lc 705 | Plasmid | Lactobacilli | β-Galactosidase (small subunit) | CAR91802 | 99.06 |
| 402 | Lactobacillus casei ATCC 334 | Chromosome | Lactobacilli | IS30 family transposase | ABJ70764 | 99.68 |
| 402 | Lactobacillus casei ATCC 334 | Chromosome | Lactobacilli | Transposase | ABJ69435 | 97.58 |
| 40837 | Leuconostoc kimchii IMSNU 11154 | Chromosome | Lactobacilli | Glutathione reductase | ADG39600 | 99.55 |
| 30359 | Lactobacillus casei BL23 | Chromosome | Lactobacilli | IS30 family transposase (TraI SLpl1) | CAQ66539 | 98.78 |
| 315 | Leuconostoc mesenteroides subsp. mesenteroides ATCC 8293 | Chromosome | Lactobacilli | Ribonuclease HI | ABJ62116 | 97.30 |
| 28537 | Lactobacillus casei str. | Plasmid | Lactobacilli | Conserved hypothetical protein | ACI34378 | 92.39 |
